# Supplementary material for: H3K9 methylation and RNA interference regulate nucleolar organization and repeated DNA stability
Source: Springer Nature journal article supplement (doi:10.1038/ncb1514), 2006-12-10
Supplement: 41556_2007_BFncb1514_MOESM1_ESM.pdf [file 41556_2007_BFncb1514_MOESM1_ESM.pdf]

Supplemental Table 1: Effects of mutations on salivary gland nucleoli.

| Locus                      | Encoded Protein/Molecular Function                         | Alleles Tested                                          | Refs. | # Nucleoli                                                |                                  |                        |
|----------------------------|------------------------------------------------------------|---------------------------------------------------------|-------|-----------------------------------------------------------|----------------------------------|------------------------|
|                            |                                                            |                                                         |       | Mean $\pm$ SD                                             | Range                            | <sup>c</sup> P values  |
| Wild type <sup>a</sup>     |                                                            |                                                         |       | 1 $\pm$ 0                                                 | 1                                | NA                     |
| <i>Su(var)3-9</i>          | H3K9 methyltransferase                                     | 1699 (missense), 6 and 17 (nulls)                       | 1,2   | 2.7 $\pm$ 1.4<br>N = 54                                   | 1 to 9 (null);<br>1 to 12 (1699) | <0.001                 |
| <i>Su(var)2-5 / HP1</i>    | chromodomain/<br>binds H3K9me                              | transheterozygous<br>1009/1209 (nulls)                  | 1     | 2.8 $\pm$ 0.83<br>N = 21                                  | 1 to 4                           | <0.001                 |
| <i>Su(var)2-10 / dPIAS</i> | Protein Inhibitor<br>of Activated<br>STAT /<br>SUMOylation | transheterozygous<br>02/Pex14A (nulls)                  | 3     | multiple <sup>b</sup>                                     | N.D. <sup>b</sup>                |                        |
| <i>Su(TDA-PEV) 1650</i>    | ??                                                         | 1650                                                    | 1     | 3.6 $\pm$ 1.6<br>N = 35                                   | 1 to 8                           | <0.001                 |
| <i>Su(var)3-7</i>          | zinc Finger/ DNA<br>binding                                | 234                                                     | 1     | 1 <sup>b</sup>                                            |                                  |                        |
| <i>l(3)73Ah</i>            | ubiquitin ligase                                           | 1044                                                    | 1     | 1 <sup>b</sup>                                            |                                  |                        |
| <i>Su(TDA-PEV) 1025</i>    | ??                                                         | 1025                                                    | 1     | 1 <sup>b</sup>                                            |                                  |                        |
| <i>Su(TDA-PEV) 1260</i>    | ??                                                         | 1260                                                    | 1     | 1 <sup>b</sup>                                            |                                  |                        |
| <i>Su(TDA-PEV) 1128</i>    | ??                                                         | 1128                                                    | 1     | 1 <sup>b</sup>                                            |                                  |                        |
| <i>Su(var)4-20</i>         | H4K20<br>methyltransferase                                 | BG00814 and<br>EY07422 P<br>insertions<br>(hypomorphic) | 4     | 1 <sup>b</sup>                                            |                                  |                        |
| <i>dSIR2</i>               | NAD-dependent<br>histone<br>deacetylase                    | 17 (null)                                               | 5     | 1 <sup>b</sup>                                            |                                  |                        |
| <i>Pc</i>                  | PcG complex                                                | 1 and 7 (nulls)                                         | 6,7   | 1 <sup>b</sup>                                            |                                  |                        |
| <i>Ph</i>                  | PcG complex                                                | 410 (null)                                              | 8     | 1 <sup>b</sup>                                            |                                  |                        |
| <i>Lig4</i>                | DNA ligase                                                 | 29 and 57 (nulls)                                       | 9     | 1 <sup>b</sup>                                            |                                  |                        |
| <i>Lig4; Su(var)3-9</i>    | N.A.                                                       | double<br>transheterozygous<br>mutant                   |       | 1.7 $\pm$ 0.8<br>N = 83                                   | 1 to 4                           | <0.001 <sup>d</sup>    |
| <i>Ago2</i>                | siRNA loading                                              | 51B (null)                                              | 10    | 2.5 $\pm$ 1.3<br>N = 79                                   | 1 to 5                           | 0.001                  |
| <i>Aub</i>                 | RNAi complex                                               | QC42 (?)                                                | 11    | 1.1 $\pm$ 0.4<br>N = 85                                   | 1 to 3                           | 0.004                  |
| <i>hls / Spn-E</i>         | RNA helicase (of<br>RNAi complex)                          | $\Delta$ 215 (null) and 1<br>(hypomorph)                | 12,13 | 1.1 $\pm$ 0.3<br>N = 40<br>and<br>1.6 $\pm$ 0.8<br>N = 78 | 1 to 4                           | 0.083<br>and<br><0.001 |

|              |                                                               |                                            |    |                     |        |        |
|--------------|---------------------------------------------------------------|--------------------------------------------|----|---------------------|--------|--------|
| <i>piwi</i>  | mRNA binding (of RNAi complex)                                | 06843 (null)                               | 14 | 1.8± 1.0<br>N = 102 | 1 to 5 | <0.001 |
| <i>dcr-2</i> | RNase III-like endonuclease and helicase for siRNA production | L811fsx (hypomorph) and P insertion (null) | 15 | 3.4± 1.9<br>N = 60  | 1 to 6 | <0.001 |

<sup>a</sup> heterozygous for *Su(var)*

<sup>b</sup> evaluated qualitatively from multiple images

<sup>c</sup> p values reflect comparisons of the mean # nucleoli in wild type versus mutant

<sup>d</sup> p values reflect comparisons of the mean # nucleoli in the double mutant versus wild type, and separately versus *Su(var)3-9<sup>null</sup>* mutant

1. Donaldson, K.M., Lui, A. & Karpen, G.H. Modifiers of terminal deficiency-associated position effect variegation in *Drosophila*. *Genetics* **160**, 995-1009 (2002).
2. Schotta, G. et al. Central role of *Drosophila* SU(VAR)3-9 in histone H3-K9 methylation and heterochromatic gene silencing. *Embo J* **21**, 1121-31 (2002).
3. Hari, K.L., Cook, K.R. & Karpen, G.H. The *Drosophila* *Su(var)2-10* locus regulates chromosome structure and function and encodes a member of the PIAS protein family. *Genes Dev* **15**, 1334-48 (2001).
4. Schotta, G. et al. A silencing pathway to induce H3-K9 and H4-K20 trimethylation at constitutive heterochromatin. *Genes Dev* **18**, 1251-62 (2004).
5. Astrom, S.U., Cline, T.W. & Rine, J. The *Drosophila melanogaster* *sir2+* gene is nonessential and has only minor effects on position-effect variegation. *Genetics* **163**, 931-7 (2003).
6. Gindhart-Jr, J.G. & Kaufman, T.C. Identification of Polycomb and trithorax Group Responsive Elements in the Regulatory Region of the *Drosophila* Homeotic Gene *Sex combs reduced*. *Genetics* **139**, 797-814 (1995).
7. Tearle, R.G. & Nusslein-Volhard, C. *Tubingen mutants and stock list*, 209--269 (1987).
8. Hodgson, J.W. et al. The polyhomeotic locus of *Drosophila melanogaster* is transcriptionally and post-transcriptionally regulated during embryogenesis. *Mech Dev* **66**, 69-81 (1997).
9. Romeijn, R. & Ferro, W. *ligase4* mutations. (2004).
10. Xu, K. et al. The fragile X-related Gene Affects the Crawling Behavior of *Drosophila* Larvae by Regulating the mRNA Level of the DEG/ENaC Protein Pickpocket1. *Current Biology* **14**, 1025-1034 (2004).
11. Wilson, J.E., Connell, J.E., Schlenker, J.D. & Macdonald, P.M. Novel genetic screen for genes involved in posterior body patterning in *Drosophila*. *Dev Genet* **19**, 199-209 (1996).
12. Gillespie, D.E. & Berg, C.A. Homeless is required for RNA localization in *Drosophila* oogenesis and encodes a new member of the DE-H family of RNA-dependent ATPases. *Genes Dev* **9**, 2495-508 (1995).
13. Gonzalez-Reyes, A., Elliott, H. & St Johnston, D. Oocyte determination and the origin of polarity in *Drosophila*: the role of the spindle genes. *Development* **124**, 4927-4937 (1997).
14. Lin, H. & Spradling, A.C. A novel group of pumilio mutations affects the asymmetric division of germline stem cells in the *Drosophila* ovary. *Development* **124**, 2463-2476 (1997).
15. Lee, Y.S. et al. Distinct Roles for *Drosophila* Dicer-1 and Dicer-2 in the siRNA/miRNA Silencing Pathways. *Cell* **117**, 69 (2004).
